# Supplementary material for: Lipid Digestibility and Polyphenols Bioaccessibility of Oil-in-Water Emulsions Containing Avocado Peel and Seed Extracts as Affected by the Presence of Low Methoxyl Pectin
Source: MDPI journal article supplement (doi:10.3390/foods10092193), 2021-09-16
Supplement: s1 [file s1]

## SUPPLEMENTARY TABLES

**S1.** Concentration of the phenolic compounds from avocado peel (AP) released after the simulated intestinal digestion of oil-in-water emulsions, with or without low methoxyl pectin (LMP).

| Phenolic compounds                   | Digested emulsion |                          |                |                          | Released fraction  |                          |                |                          |
|--------------------------------------|-------------------|--------------------------|----------------|--------------------------|--------------------|--------------------------|----------------|--------------------------|
|                                      | Containing LMP    |                          | Without LMP    |                          | Containing LMP     |                          | Without LMP    |                          |
|                                      | Blank emulsion    | Emulsion with AP extract | Blank emulsion | Emulsion with AP extract | Blank emulsion     | Emulsion with AP extract | Blank emulsion | Emulsion with AP extract |
| Protocatechuic acid glucoside        | n.d.              | n.d.                     | n.d.           | 7.67                     | n.d.               | n.d.                     | n.d.           | n.d.                     |
| Hydroxytyrosol                       | n.d.              | n.d.                     | n.d.           | n.d.                     | n.d.               | 0.39 ± 0.26              | n.d.           | 0.64                     |
| Hydroxytyrosol glucoside             | n.d.              | n.d.                     | n.d.           | n.d.                     | n.d.               | n.d.                     | n.d.           | n.d.                     |
| Hydroxytyrosol glucoside arabinoside | n.d.              | n.d.                     | n.d.           | n.d.                     | n.d.               | n.d.                     | n.d.           | n.d.                     |
| Tyrosol glucoside                    | n.d.              | n.d.                     | n.d.           | n.d.                     | n.d.               | n.d.                     | n.d.           | n.d.                     |
| Tyrosol glucoside arabinoside        | n.d.              | n.d.                     | n.d.           | n.d.                     | n.d.               | n.d.                     | n.d.           | n.d.                     |
| Salidroside                          | n.d.              | n.d.                     | n.d.           | n.d.                     | n.d.               | n.d.                     | n.d.           | n.d.                     |
| P-coumaric acid                      | 0.50 ± 0.00       | 17.1 ± 0.26              | n.d.           | 60.1                     | 0.81 ± 0.54        | 46.4 ± 5.77              | 4.79           | 71.7                     |
| Coumaroylquinic acid                 | n.d.              | 0.42 ± 0.39              | n.d.           | 3.77                     | n.d.               | 1.77 ± 0.12              | n.d.           | 4.30                     |
| Caffeic acid                         | 0.63 ± 0.50       | 15.3 ± 0.79              | n.d.           | 62.8                     | 0.73 ± 0.23        | 36.4 ± 0.68              | 9.65           | 73.1                     |
| Caffeoylshikimic acid                | n.d.              | 0.17 ± 0.03              | n.d.           | 1.10                     | n.d.               | 0.53 ± 0.26              | n.d.           | 10.5                     |
| Caffeic acid glucoside               | n.d.              | 0.38 ± 0.21              | n.d.           | 1.92                     | n.d.               | 0.33 ± 0.24              | n.d.           | 0.86                     |
| 3- <i>O</i> -caffeoylquinic acid     | 3.39 ± 1.52       | 4.96 ± 2.28              | n.d.           | 21.8                     | n.d.               | 327.0 ± 28.7             | n.d.           | 0.84                     |
| 4- <i>O</i> -caffeoylquinic acid     | n.d.              | 2.25 ± 0.34              | n.d.           | 8.43                     | n.d.               | 6.76 ± 1.34              | n.d.           | 13.0                     |
| 5- <i>O</i> -caffeoylquinic acid     | 2.56 ± 2.47       | 45.0 ± 7.36              | n.d.           | 232.6                    | n.d.               | 101.2 ± 7.36             | n.d.           | 281.5                    |
| (Iso) ferulic acid                   | n.d.              | 3.05 ± 0.50              | n.d.           | 10.2                     | 0.41 ± 0.00        | 7.96 ± 0.47              | n.d.           | 10.2                     |
| Dihydroferulic acid                  | n.d.              | 0.32 ± 0.09              | n.d.           | 0.60                     | n.d.               | 0.81 ± 0.01              | n.d.           | 1.29                     |
| Ferulic acid glucoside               | n.d.              | 2.23 ± 0.47              | n.d.           | 11.4                     | n.d.               | 7.19 ± 1.58              | n.d.           | 17.8                     |
| Dihydroferulic acid glucoside        | n.d.              | 0.49 ± 0.15              | n.d.           | 1.06                     | n.d.               | 0.85 ± 0.28              | n.d.           | 2.59                     |
| 4- <i>O</i> -feruoylquinic acid      | n.d.              | 1.14 ± 0.34              | n.d.           | 2.83                     | n.d.               | 2.88 ± 0.02              | n.d.           | 4.69                     |
| 5- <i>O</i> -feruoylquinic acid      | n.d.              | n.d.                     | n.d.           | n.d.                     | n.d.               | 3.29 ± 0.19              | n.d.           | 6.25                     |
| 6- <i>O</i> -feruoylquinic acid      | n.d.              | 2.19 ± 0.12              | n.d.           | 6.58                     | n.d.               | 5.47 ± 0.13              | n.d.           | 8.60                     |
| <b>Total phenolic acids</b>          | <b>7.5 ± 4.46</b> | <b>95.01 ± 11.70</b>     | <b>n.d.</b>    | <b>425.19</b>            | <b>5.67 ± 0.87</b> | <b>124.31 ± 12.12</b>    | <b>14.44</b>   | <b>507.86</b>            |
| Catechin                             | 2.92 ± 2.88       | 71.4 ± 3.46              | n.d.           | 518.3                    | n.d.               | 63.2 ± 6.63              | n.d.           | 175.8                    |
| Epicatechin                          | 6.60 ± 7.40       | 810.1 ± 100.9            | n.d.           | 271.8                    | n.d.               | 815.6 ± 88.5             | n.d.           | 2038.4                   |
| Epigallocatechin                     | n.d.              | n.d.                     | n.d.           | 10.8                     | n.d.               | n.d.                     | n.d.           | n.d.                     |
| Catechin glucoside                   | n.d.              | n.d.                     | n.d.           | 11.5                     | n.d.               | n.d.                     | n.d.           | n.d.                     |
| Epicatechin glucoside                | n.d.              | 32.8 ± 9.58              | n.d.           | 177.9                    | n.d.               | 39.0 ± 9.20              | n.d.           | 115.2                    |
| Dimer (type A)                       | n.d.              | 72.4 ± 16.6              | n.d.           | 368.7                    | n.d.               | 42.0 ± 5.58              | n.d.           | 122.2                    |
| Dimer (type B)                       | n.d.              | 774.6 ± 57.9             | n.d.           | 4616.0                   | n.d.               | 813.9 ± 34.7             | n.d.           | 2218.2                   |
| Trimer (type A)                      | 1.93 ± 0.66       | 49.0 ± 15.5              | n.d.           | 481.7                    | n.d.               | 45.8 ± 5.13              | n.d.           | 143.3                    |

|                                    |                    |                         |             |                |                    |                         |             |               |
|------------------------------------|--------------------|-------------------------|-------------|----------------|--------------------|-------------------------|-------------|---------------|
| Trimer (type B)                    | n.d.               | 173.9 ± 22.4            | n.d.        | 2098.7         | n.d.               | 208.1 ± 3.55            | n.d.        | 277.7         |
| Tetramer                           | n.d.               | 4.53 ± 4.41             | n.d.        | 118.1          | n.d.               | 13.6 ± 0.12             | n.d.        | 61.8          |
| Pentamer                           | n.d.               | n.d.                    | n.d.        | n.d.           | n.d.               | n.d.                    | n.d.        | n.d.          |
| Hexamer                            | n.d.               | n.d.                    | n.d.        | 38.4           | n.d.               | n.d.                    | n.d.        | n.d.          |
| Quercetin                          | n.d.               | 2.50 ± 1.13             | n.d.        | 4.15           | n.d.               | n.d.                    | n.d.        | 3.78          |
| Quercetin arabinoside              | n.d.               | 0.70 ± 0.06             | n.d.        | 2.72           | n.d.               | n.d.                    | n.d.        | 3.33          |
| Quercetin rhamnoside               | n.d.               | 0.83 ± 0.54             | n.d.        | 2.06           | n.d.               | n.d.                    | n.d.        | 2.06          |
| Quercetin glucoside                | n.d.               | 34.0 ± 10.4             | n.d.        | 131.7          | n.d.               | 22.2 ± 5.61             | n.d.        | 49.8          |
| Quercetin glucuronide              | n.d.               | 13.6 ± 0.47             | n.d.        | 76.4           | n.d.               | 27.5 ± 1.26             | n.d.        | 74.3          |
| Quercetin glucoside arabinoside    | n.d.               | 257.8 ± 96.1            | n.d.        | 913.7          | n.d.               | 244.8 ± 45.8            | n.d.        | 568.1         |
| Quercetin rutinoside               | n.d.               | 11.2 ± 1.36             | n.d.        | 34.6           | n.d.               | 17.9 ± 6.01             | n.d.        | 29.9          |
| Quercetin diglucoside              | n.d.               | 164.4 ± 82.8            | n.d.        | 396.3          | n.d.               | 164.6 ± 22.4            | n.d.        | 855.5         |
| Multinoside A                      | n.d.               | 43.2 ± 2.28             | n.d.        | 103.8          | n.d.               | 37.9 ± 2.53             | n.d.        | 132.3         |
| Kaempferol glucoside               | n.d.               | 7.62 ± 2.43             | n.d.        | 23.3           | n.d.               | n.d.                    | n.d.        | n.d.          |
| Kampeferol glucosido arabinoside   | n.d.               | 84.4 ± 7.22             | n.d.        | 148.4          | n.d.               | 60.4 ± 14.1             | n.d.        | 183.4         |
| Kampeferol rutinoside              | n.d.               | 29.0 ± 1.95             | n.d.        | 59.1           | n.d.               | 25.6 ± 2.78             | n.d.        | 81.7          |
| Kampeferol diglucoside             | n.d.               | 103.5 ± 41.8            | n.d.        | 159.1          | n.d.               | 174.8 ± 2.83            | n.d.        | 317.9         |
| Isorhamnetin arabinoside           | n.d.               | 0.16 ± 0.00             | n.d.        | 0.33           | n.d.               | n.d.                    | n.d.        | n.d.          |
| Isorhamnetin glucuronide           | n.d.               | 2.58 ± 0.37             | n.d.        | 13.2           | n.d.               | 6.96 ± 3.33             | n.d.        | 25.0          |
| Isorhamnetin arabinoside glucoside | n.d.               | 0.61 ± 0.20             | n.d.        | 1.51           | n.d.               | 0.52 ± 0.01             | n.d.        | 1.65          |
| Isorhamnetin derivative            | n.d.               | 1.29 ± 0.88             | n.d.        | 4.01           | n.d.               | 2.39 ± 0.59             | n.d.        | 5.48          |
| <b>Total Flavonoids</b>            | <i>11.4 ± 10.9</i> | <i>2745.93 ± 291.56</i> | <i>n.d.</i> | <i>13997.3</i> | <i>n.d.</i>        | <i>2827.06 ± 193.95</i> | <i>n.d.</i> | <i>7487.1</i> |
| Penstemide                         | n.d.               | 9.08 ± 0.61             | n.d.        | 58.2           | n.d.               | 22.3 ± 5.70             | n.d.        | 40.9          |
| Cinchonain                         | n.d.               | 4.53 ± 3.02             | n.d.        | 28.8           | n.d.               | n.d.                    | n.d.        | n.d.          |
| nudiposide                         | n.d.               | 1.64 ± 0.29             | n.d.        | 3.84           | n.d.               | 4.11 ± 0.82             | n.d.        | 7.23          |
| <b>Total terpenes</b>              | <i>n.d.</i>        | <i>15.2 ± 3.36</i>      | <i>n.d.</i> | <i>90.8</i>    | <i>n.d.</i>        | <i>26.4 ± 4.88</i>      | <i>n.d.</i> | <i>48.1</i>   |
| <b>TOTAL (mg/100 g)</b>            | <i>24.5 ± 17.1</i> | <i>2856.1 ± 185.6</i>   | <i>6.89</i> | <i>14520.0</i> | <i>2.93 ± 1.30</i> | <i>3402.7 ± 158.3</i>   | <i>27.0</i> | <i>8836.3</i> |
| <b>TOTAL (g/100 g)</b>             | <i>0.02 ± 0.02</i> | <i>2.86 ± 0.19</i>      | <i>0.01</i> | <i>14.5</i>    | <i>0.00 ± 0.00</i> | <i>3.40 ± 0.16</i>      | <i>0.03</i> | <i>8.84</i>   |

Data expressed as mg individual phenolic compound per 100 g of sample ± standard deviation.

**S2.** Concentration of the phenolic compounds from avocado seed (AS) released after the simulated intestinal digestion of oil-in-water emulsions, with or without low methoxyl pectin (LMP).

| Phenolic compounds                   | Digested emulsion   |                          |                |                          | Released fraction  |                          |                |                          |
|--------------------------------------|---------------------|--------------------------|----------------|--------------------------|--------------------|--------------------------|----------------|--------------------------|
|                                      | Containing LMP      |                          | Without LMP    |                          | Containing LMP     |                          | Without LMP    |                          |
|                                      | Blank emulsion      | Emulsion with AS extract | Blank emulsion | Emulsion with AS extract | Blank emulsion     | Emulsion with AS extract | Blank emulsion | Emulsion with AS extract |
| <i>p</i> -hydroxybenzoic acid        | 0.76 ± 0.33         | 1.16 ± 0.11              | 0.69           | 2.90                     | 0.98 ± 0.36        | 1.89 ± 0.14              | 1.26           | 3.37                     |
| Protocatechuic acid                  | n.d.                | 3.88 ± 0.03              | n.d.           | 12.0                     | n.d.               | n.d.                     | n.d.           | n.d.                     |
| Protocatechuic acid glucoside        | n.d.                | n.d.                     | n.d.           | n.d.                     | n.d.               | n.d.                     | n.d.           | n.d.                     |
| Hydroxytyrosol                       | n.d.                | 0.63 ± 0.36              | n.d.           | 2.56                     | n.d.               | 1.09 ± 0.63              | n.d.           | 3.75                     |
| Hydroxytyrosol glucoside             | n.d.                | 2.34 ± 0.06              | n.d.           | 12.2                     | n.d.               | 4.14 ± 0.15              | n.d.           | 11.0                     |
| Hydroxytyrosol glucoside arabinoside | n.d.                | 8.79 ± 1.55              | n.d.           | 37.9                     | n.d.               | 10.8 ± 1.90              | n.d.           | 43.2                     |
| Tyrosol glucoside                    | n.d.                | n.d.                     | n.d.           | n.d.                     | n.d.               | n.d.                     | n.d.           | n.d.                     |
| Tyrosol glucoside arabinoside        | n.d.                | 23.0 ± 3.20              | n.d.           | 119.3                    | n.d.               | n.d.                     | n.d.           | n.d.                     |
| Salidroside                          | 5.24 ± 1.33         | 116.9 ± 4.48             | n.d.           | 1013.1                   | n.d.               | 78.0 ± 0.43              | n.d.           | 194.1                    |
| Hydroxysalidroside                   | n.d.                | 9.40 ± 5.89              | n.d.           | 67.7                     | n.d.               | 2.34 ± 3.31              | n.d.           | n.d.                     |
| <i>p</i> -coumaric acid              | 0.49 ± 0.00         | 2.95 ± 0.08              | n.d.           | 7.72                     | 0.81 ± 0.54        | 6.00 ± 0.54              | 0.48           | 9.12                     |
| Coumaroylquinic acid                 | n.d.                | 4.47 ± 0.20              | n.d.           | 23.4                     | n.d.               | 14.6 ± 0.14              | n.d.           | 30.3                     |
| Caffeic acid                         | 0.63 ± 0.46         | 15.2 ± 0.03              | n.d.           | 52.2                     | 0.73 ± 0.23        | 23.5 ± 2.39              | 0.96           | 55.0                     |
| Dihydrocaffeic acid                  | n.d.                | n.d.                     | n.d.           | n.d.                     | n.d.               | n.d.                     | n.d.           | n.d.                     |
| Caffeoylshikimic acid                | n.d.                | n.d.                     | n.d.           | n.d.                     | n.d.               | n.d.                     | n.d.           | n.d.                     |
| Caffeic acid glucoside               | n.d.                | n.d.                     | n.d.           | 1.53                     | n.d.               | 0.72 ± 0.02              | n.d.           | 1.67                     |
| Dihydrocaffeic acid glucoside        | n.d.                | n.d.                     | n.d.           | 2.20                     | n.d.               | 0.96 ± 0.12              | n.d.           | 1.6                      |
| 3- <i>O</i> -caffeoylquinic acid     | 3.39 ± 1.52         | 95.3 ± 7.19              | n.d.           | 669.3                    | n.d.               | 199.9 ± 54.7             | n.d.           | 748.1                    |
| 5- <i>O</i> -caffeoylquinic acid     | n.d.                | 85.6 ± 10.3              | n.d.           | 310                      | n.d.               | 185 ± 12.7               | n.d.           | 630                      |
| 4- <i>O</i> -caffeoylquinic acid     | 2.56 ± 2.47         | 69.5 ± 2.45              | n.d.           | 287.9                    | n.d.               | 146.3 ± 20.7             | n.d.           | 332.5                    |
| ( <i>iso</i> ) ferulic acid          | n.d.                | n.d.                     | n.d.           | n.d.                     | 0.41 ± 0.00        | 0.58 ± 0.09              | n.d.           | 0.64                     |
| Ferulic acid glucoside               | n.d.                | 1.20 ± 0.33              | n.d.           | 6.34                     | n.d.               | 2.37 ± 1.60              | n.d.           | 5.30                     |
| Dihydroferulic acid glucoside        | n.d.                | n.d.                     | n.d.           | n.d.                     | n.d.               | n.d.                     | n.d.           | n.d.                     |
| 3- <i>O</i> -feruloylquinic acid     | n.d.                | 0.86 ± 0.15              | n.d.           | 3.49                     | n.d.               | 2.46 ± 0.06              | n.d.           | 4.37                     |
| 5- <i>O</i> -feruloylquinic acid     | n.d.                | n.d.                     | n.d.           | n.d.                     | n.d.               | 1.59 ± 0.01              | n.d.           | 2.85                     |
| 4- <i>O</i> -feruloylquinic acid     | n.d.                | 2.62 ± 0.02              | n.d.           | 12.5                     | n.d.               | 5.64 ± 0.18              | n.d.           | 14.6                     |
| <b>Total phenolic acids</b>          | <b>10.16 ± 6.11</b> | <b>366.4 ± 27.60</b>     | <b>0.69</b>    | <b>2365.4</b>            | <b>2.52 ± 1.13</b> | <b>521.5 ± 88.38</b>     | <b>2.7</b>     | <b>1530.90</b>           |
| Catechin                             | 2.92 ± 2.88         | 55.0 ± 5.06              | n.d.           | 574.8                    | n.d.               | 54.4 ± 8.71              | n.d.           | 233.6                    |
| Epicatechin                          | 6.60 ± 7.40         | 201.6 ± 49.1             | n.d.           | 1030.6                   | n.d.               | 122.6 ± 10.5             | n.d.           | 433.7                    |
| Epigallocatechin                     | n.d.                | n.d.                     | n.d.           | n.d.                     | n.d.               | n.d.                     | n.d.           | n.d.                     |
| Epicatequina galato                  | n.d.                | 1.09 ± 0.63              | n.d.           | 7.22                     | n.d.               | 7.56 ± 0.45              | n.d.           | 16.6                     |

|                                   |                             |                                |                    |                       |                           |                                |                    |                       |
|-----------------------------------|-----------------------------|--------------------------------|--------------------|-----------------------|---------------------------|--------------------------------|--------------------|-----------------------|
| Catechin glucoside                | n.d.                        | 11.0 ± 3.66                    | n.d.               | 60.5                  | n.d.                      | 16.4 ± 2.19                    | n.d.               | 56.6                  |
| Epicatechin glucoside             | n.d.                        | 20.6 ± 4.56                    | n.d.               | 106.0                 | n.d.                      | n.d.                           | n.d.               | n.d.                  |
| Dimer (type A)                    | n.d.                        | 26.6 ± 2.42                    | n.d.               | 129.5                 | n.d.                      | 8.53 ± 2.57                    | n.d.               | 49.3                  |
| Dimer (type B)                    | n.d.                        | 88.7 ± 1.30                    | n.d.               | 754.8                 | n.d.                      | 70.4 ± 11.1                    | n.d.               | 391.9                 |
| Trimer (type A)                   | 1.93 ± 0.66                 | 306.6 ± 5.77                   | n.d.               | 1446.4                | n.d.                      | 154.3 ± 24.1                   | n.d.               | 734.6                 |
| Trimer (type B)                   | n.d.                        | 7.20 ± 0.37                    | n.d.               | 65.6                  | n.d.                      | 3.78 ± 0.08                    | n.d.               | 31.2                  |
| Tetramer                          | n.d.                        | 0.52 ± 0.73                    | n.d.               | 6.26                  | n.d.                      | n.d.                           | n.d.               | 7.39                  |
| Quercetin glucoside               | n.d.                        | 3.63 ± 1.38                    | n.d.               | 11.2                  | n.d.                      | 2.19 ± 0.00                    | n.d.               | 7.56                  |
| Quercetin diglucoside             | n.d.                        | 3.40 ± 0.63                    | n.d.               | 11.1                  | n.d.                      | 4.26 ± 0.23                    | n.d.               | 8.74                  |
| Quercetin glucuronide             | n.d.                        | n.d.                           | n.d.               | n.d.                  | n.d.                      | 0.57 ± 0.81                    | n.d.               | n.d.                  |
| Quercetin glucoside arabinoside   | n.d.                        | n.d.                           | n.d.               | n.d.                  | n.d.                      | 2.30 ± 0.22                    | n.d.               | 2.57                  |
| Quercetin rutinósido              | n.d.                        | n.d.                           | n.d.               | n.d.                  | n.d.                      | n.d.                           | n.d.               | n.d.                  |
| Kaempferol glucoside              | n.d.                        | n.d.                           | n.d.               | n.d.                  | n.d.                      | n.d.                           | n.d.               | n.d.                  |
| Kampeferol glucosido arabinoside  | n.d.                        | n.d.                           | n.d.               | n.d.                  | n.d.                      | 1.44 ± 2.03                    | n.d.               | n.d.                  |
| <i>Total kaempferol derivates</i> | n.d.                        | n.d.                           | n.d.               | n.d.                  | n.d.                      | 1.44 ± 2.03                    | n.d.               | n.d.                  |
| Isorhamnetin arabinoside          | n.d.                        | 1.77 ± 0.59                    | n.d.               | 3.95                  | n.d.                      | 0.96 ± 0.08                    | n.d.               | 2.93                  |
| <b><i>Total flavonoids</i></b>    | <b><i>11.4. ± 10.9</i></b>  | <b><i>727.8 ± 76.2</i></b>     | <b><i>0.69</i></b> | <b><i>4207.95</i></b> | <b><i>n.d.</i></b>        | <b><i>498.17 ± 60.93</i></b>   | <b><i>n.d.</i></b> | <b><i>1976.73</i></b> |
| Penstemide                        | n.d.                        | 2.73 ± 0.11                    | n.d.               | 9.60                  | n.d.                      | 9.08 ± 1.03                    | n.d.               | 21.8                  |
| <b><i>Total terpenes</i></b>      | <b><i>n.d.</i></b>          | <b><i>2.73 ± 0.10</i></b>      | <b><i>n.d.</i></b> | <b><i>9.60</i></b>    | <b><i>n.d.</i></b>        | <b><i>9.08 ± 1.03</i></b>      | <b><i>n.d.</i></b> | <b><i>21.8</i></b>    |
| <b><i>TOTAL (mg/kg)</i></b>       | <b><i>21.56 ± 17.01</i></b> | <b><i>1097.30 ± 103.90</i></b> | <b><i>0.69</i></b> | <b><i>6582.95</i></b> | <b><i>2.52 ± 1.13</i></b> | <b><i>1028.75 ± 150.34</i></b> | <b><i>2.70</i></b> | <b><i>3529.43</i></b> |
| <b><i>TOTAL (g/kg)</i></b>        | <b><i>0.02 ± 0.02</i></b>   | <b><i>1.10 ± 0.10</i></b>      | <b><i>0.00</i></b> | <b><i>6.58</i></b>    | <b><i>0.00 ± 0.00</i></b> | <b><i>1.03 ± 0.15</i></b>      | <b><i>0.00</i></b> | <b><i>3.53</i></b>    |

Data expressed as mg individual phenolic compound per 100 g of sample ± standard deviation.
